# Supplementary material for: Healthy Habits, Physical Activity, Stress, and Food Consumption Trends in Chilean Adults with Irritable Bowel Syndrome during the COVID-19 Pandemic
Source: MDPI journal article supplement (doi:10.3390/ijerph21050533), 2024-04-25
Supplement: s1 [file s1]

CODE

**Suppl.1. Quantified Survey on Food Consumption Trends**

**Name:**

**Date:**

**INSTRUCTIONS**

| 1.- Cereals                                          | Nev<br>er or<br>hard<br>ly<br>ever | Ev<br>er<br>y<br>m<br>on<br>th | Every week |     |     | Every day |     |     |    |
|------------------------------------------------------|------------------------------------|--------------------------------|------------|-----|-----|-----------|-----|-----|----|
|                                                      |                                    | 1-3                            | 1          | 2-4 | 5-6 | 1         | 2-3 | 4-6 | +6 |
| Whole wheat bread (2 slices)                         |                                    |                                |            |     |     |           |     |     |    |
| Marraqueta bread (1/2 unit)                          |                                    |                                |            |     |     |           |     |     |    |
| Hallulla bread (1/2 unit)                            |                                    |                                |            |     |     |           |     |     |    |
| White sandwich bread (2 slices)                      |                                    |                                |            |     |     |           |     |     |    |
| Rice (3/4 cup)                                       |                                    |                                |            |     |     |           |     |     |    |
| Noodles (1 cup)                                      |                                    |                                |            |     |     |           |     |     |    |
| Oats (4 tablespoons)                                 |                                    |                                |            |     |     |           |     |     |    |
| Breakfast cereals (check the portion on the package) |                                    |                                |            |     |     |           |     |     |    |
| Boiled potatoes (egg-sized unit)                     |                                    |                                |            |     |     |           |     |     |    |
| Others: please specify                               |                                    |                                |            |     |     |           |     |     |    |
|                                                      |                                    |                                |            |     |     |           |     |     |    |

**For each food item, mark the box that indicates your usual consumption frequency. Each food item will have a specified portion, and if you consume more than the portion, please specify how much.**

| 2.- Vegetables | Nev<br>er or | Ev<br>er | Every week |  | Every day |  |
|----------------|--------------|----------|------------|--|-----------|--|
|                |              |          |            |  |           |  |



|                         |  |  |  |  |  |  |  |  |  |
|-------------------------|--|--|--|--|--|--|--|--|--|
| Strawberries (1 cup)    |  |  |  |  |  |  |  |  |  |
| Grapes (10 to 12 units) |  |  |  |  |  |  |  |  |  |
| Others:                 |  |  |  |  |  |  |  |  |  |
|                         |  |  |  |  |  |  |  |  |  |
|                         |  |  |  |  |  |  |  |  |  |

| <b>4.- Meats</b><br>Describe the meats you regularly consume and in what portions.<br>Describe processed meats: Ham (turkey, chicken, or pork), other cured meats, and their portions (6 x 6 x 1 cm). | <b>Never or hardly ever</b> | <b>Every month</b> | <b>Every week</b> |     |     | <b>Every day</b> |     |     |     |
|-------------------------------------------------------------------------------------------------------------------------------------------------------------------------------------------------------|-----------------------------|--------------------|-------------------|-----|-----|------------------|-----|-----|-----|
|                                                                                                                                                                                                       |                             | 1-3                | 1                 | 2-4 | 5-6 | 1                | 2-3 | 4-6 | + 6 |
| Chicken                                                                                                                                                                                               |                             |                    |                   |     |     |                  |     |     |     |
| Red meat                                                                                                                                                                                              |                             |                    |                   |     |     |                  |     |     |     |
| Fish                                                                                                                                                                                                  |                             |                    |                   |     |     |                  |     |     |     |
|                                                                                                                                                                                                       |                             |                    |                   |     |     |                  |     |     |     |
|                                                                                                                                                                                                       |                             |                    |                   |     |     |                  |     |     |     |
|                                                                                                                                                                                                       |                             |                    |                   |     |     |                  |     |     |     |
|                                                                                                                                                                                                       |                             |                    |                   |     |     |                  |     |     |     |
|                                                                                                                                                                                                       |                             |                    |                   |     |     |                  |     |     |     |
|                                                                                                                                                                                                       |                             |                    |                   |     |     |                  |     |     |     |
|                                                                                                                                                                                                       |                             |                    |                   |     |     |                  |     |     |     |
|                                                                                                                                                                                                       |                             |                    |                   |     |     |                  |     |     |     |

| <b>5.- Eggs and legumes</b> | <b>Never or hardly</b> | <b>Every month</b> | <b>Every week</b> | <b>Every day</b> |
|-----------------------------|------------------------|--------------------|-------------------|------------------|
|-----------------------------|------------------------|--------------------|-------------------|------------------|



|                                                                    |  |  |  |  |  |  |  |  |  |
|--------------------------------------------------------------------|--|--|--|--|--|--|--|--|--|
| Semi-skimmed milk powder (heaping tablespoon or 3 level teaspoons) |  |  |  |  |  |  |  |  |  |
| Whole milk powder (heaping tablespoon or 3 level teaspoons)        |  |  |  |  |  |  |  |  |  |
| Full-fat yogurt (120 g)                                            |  |  |  |  |  |  |  |  |  |
| Skim yogurt (120 g)                                                |  |  |  |  |  |  |  |  |  |
| Cheese (1 slice)                                                   |  |  |  |  |  |  |  |  |  |
| Cottage cheese (1 slice, 3 cm thick)                               |  |  |  |  |  |  |  |  |  |
| Cream cheese                                                       |  |  |  |  |  |  |  |  |  |
| Other dairy: please specify                                        |  |  |  |  |  |  |  |  |  |

| <b>5.- Fats and oils</b>                        | <b>Never<br/>or<br/>hardly<br/>ever</b> | <b>Ev<br/>er<br/>y<br/>m<br/>on<br/>th</b> | <b>Every week</b> |     |     | <b>Every day</b> |     |     |    |
|-------------------------------------------------|-----------------------------------------|--------------------------------------------|-------------------|-----|-----|------------------|-----|-----|----|
|                                                 |                                         | 1-3                                        | 1                 | 2-4 | 5-6 | 1                | 2-3 | 4-6 | +6 |
| Sunflower oil (1 teaspoon)                      |                                         |                                            |                   |     |     |                  |     |     |    |
| Olive oil (1 teaspoon)                          |                                         |                                            |                   |     |     |                  |     |     |    |
| Other oil (1 teaspoon)                          |                                         |                                            |                   |     |     |                  |     |     |    |
| Butter (1 teaspoon)                             |                                         |                                            |                   |     |     |                  |     |     |    |
| Margarine (1 teaspoon)                          |                                         |                                            |                   |     |     |                  |     |     |    |
| Cream (1 teaspoon)                              |                                         |                                            |                   |     |     |                  |     |     |    |
| Peanuts (25 units)                              |                                         |                                            |                   |     |     |                  |     |     |    |
| Walnuts ( 3 units)                              |                                         |                                            |                   |     |     |                  |     |     |    |
| Almonds (15 units)                              |                                         |                                            |                   |     |     |                  |     |     |    |
| Avocado (3 tablespoons or half a small avocado) |                                         |                                            |                   |     |     |                  |     |     |    |
| Pâté                                            | NO                                      |                                            |                   |     |     |                  |     |     |    |

|                    |  |  |  |  |  |  |  |  |  |
|--------------------|--|--|--|--|--|--|--|--|--|
| Otros: Especifique |  |  |  |  |  |  |  |  |  |
|                    |  |  |  |  |  |  |  |  |  |

| <b>6.- Sugars</b>       | <b>Never<br/>or<br/>hardly<br/>ever</b> | <b>Ev<br/>er<br/>y<br/>m<br/>on<br/>th</b> | <b>Every week</b> |     |     | <b>Every day</b> |     |     |    |
|-------------------------|-----------------------------------------|--------------------------------------------|-------------------|-----|-----|------------------|-----|-----|----|
|                         |                                         | 1-3                                        | 1                 | 2-4 | 5-6 | 1                | 2-3 | 4-6 | +6 |
| Sugar                   | NO                                      |                                            |                   |     |     |                  |     |     |    |
| Honey                   |                                         | 3                                          |                   |     |     |                  | 2   |     |    |
| Palm honey              | NO                                      |                                            |                   |     |     |                  |     |     |    |
| Sweets/candies          |                                         |                                            |                   | 3   |     | 1                |     |     |    |
| Ice cream               |                                         | 1                                          |                   |     |     |                  |     |     |    |
| Sweet cookies           |                                         |                                            |                   | 3   |     | 1                |     |     |    |
| Sugary beverages        | NO                                      |                                            |                   |     |     |                  |     |     |    |
| Sugary juices           | NO                                      |                                            |                   |     |     |                  |     |     |    |
| Cakes and pastries      |                                         | 1                                          |                   |     |     |                  |     |     |    |
| Others. Please, specify |                                         |                                            |                   |     |     |                  |     |     |    |
|                         |                                         |                                            |                   |     |     |                  |     |     |    |

| <b>7.- Sweeteners</b> | <b>Never<br/>or<br/>hardly<br/>ever</b> | <b>Ev<br/>er<br/>y<br/>m<br/>on<br/>th</b> | <b>Every week</b> |     |     | <b>Every day</b> |     |     |    |
|-----------------------|-----------------------------------------|--------------------------------------------|-------------------|-----|-----|------------------|-----|-----|----|
|                       |                                         | 1-3                                        | 1                 | 2-4 | 5-6 | 1                | 2-3 | 4-6 | +6 |
| Stevia                | NO                                      |                                            |                   |     |     |                  |     |     |    |
| Stevia/sucralose      | NO                                      |                                            |                   |     |     |                  |     |     |    |
| Sucralose             | NO                                      |                                            |                   |     |     |                  |     |     |    |
| Saccharin             | NO                                      |                                            |                   |     |     |                  |     |     |    |



**Suppl. 2. LIFESTYLE ASSESSMENT**

| 1.- MEALS FREQUENCY                                              | 1 | 2 | +3 |
|------------------------------------------------------------------|---|---|----|
| How many meals do you have during the day, including snacks?     |   |   |    |
| How many meals did you have <b><u>before the quarantine?</u></b> |   |   |    |

| 2.- Regularidad de las comidas <b><u>durante la cuarentena</u></b> | Never | Once a week | 2-4 times a week | 5-6 times a week | Every day |
|--------------------------------------------------------------------|-------|-------------|------------------|------------------|-----------|
| Breakfast                                                          |       |             |                  |                  |           |
| Lunch                                                              |       |             |                  |                  |           |
| Afternoon snack                                                    |       |             |                  |                  |           |
| Dinner                                                             |       |             |                  |                  |           |
| Portions                                                           |       |             |                  |                  |           |

| 2.1- Frequency of meals <b><u>before quarantine</u></b> | Never | Once a week | 2-4 times a week | 5-6 times a week | Every day |
|---------------------------------------------------------|-------|-------------|------------------|------------------|-----------|
| Breakfast                                               |       |             |                  |                  |           |
| Lunch                                                   |       |             |                  |                  |           |
| Afternoon snack                                         |       |             |                  |                  |           |
| Dinner                                                  |       |             |                  |                  |           |
| Portions                                                |       |             |                  |                  |           |

| 3.- Drink consumption during meals <b><u>during quarantine</u></b> | Never | Sometimes | Frequently | Always |
|--------------------------------------------------------------------|-------|-----------|------------|--------|
|                                                                    |       |           |            |        |



|                                |  |  |  |  |
|--------------------------------|--|--|--|--|
| Drink consumption before meals |  |  |  |  |
| Drink consumption during meals |  |  |  |  |
| Drink consumption after meals  |  |  |  |  |

|                                                                         |       |           |            |        |
|-------------------------------------------------------------------------|-------|-----------|------------|--------|
| 3.1- Drink consumption during meals <b><u>before the quarantine</u></b> | Never | Sometimes | Frequently | Always |
| Drink consumption before meals                                          |       |           |            |        |
| Drink consumption during meals                                          |       |           |            |        |
| Drink consumption after meals                                           |       |           |            |        |

|                                                                                            |                  |          |           |         |
|--------------------------------------------------------------------------------------------|------------------|----------|-----------|---------|
| 4.- Amount of drinks consumed during meals <b><u>during quarantine.</u></b>                | ≤1 cup           | 2-3 cups | 3-4 cups  | +4 cups |
|                                                                                            |                  |          |           |         |
| 4.1- Amount of drinks consumed <b><u>during</u></b> meals <b><u>before quarantine.</u></b> | ≤1 cup           | 2-3 cups | 3-4 cups  | +4 cups |
|                                                                                            |                  |          |           |         |
| 5.- Temperature of beverages <b>during quarantine</b>                                      | Room temperature | Cold     | Very cold |         |
|                                                                                            |                  |          |           |         |
| 5.- Temperature of beverages <b>before quarantine</b>                                      | Room temperature | Cold     | Very cold |         |
|                                                                                            |                  |          |           |         |

|                                                                                       |                               |         |               |            |
|---------------------------------------------------------------------------------------|-------------------------------|---------|---------------|------------|
| 6.- Food intake                                                                       |                               |         |               |            |
| 6.1.- How well did you chew your food during meals <b><u>during quarantine?</u></b>   | Not very well                 | Well    | Very well     |            |
|                                                                                       |                               |         |               |            |
| 6.1.- How well did you chew your food during meals <b><u>before quarantine?</u></b>   | Not very well                 | Well    | Very well     |            |
|                                                                                       |                               |         |               |            |
| 6.2.- How much time did you take for lunch or dinner <b><u>during quarantine?</u></b> | I never have lunch or dinner. | <10 min | 10-20 min     | >20 min    |
|                                                                                       |                               |         |               |            |
| 6.2.- How much time did you take for lunch or dinner <b><u>before quarantine?</u></b> | I never have lunch or dinner. | <10 min | 10-20 min     | >20 min    |
|                                                                                       |                               |         |               |            |
| 6.3 How soon after eating did you have a snack <b><u>during quarantine?</u></b>       | I never take a nap.           | <30 min | 0.5 a 2 hours | > 4 hours  |
|                                                                                       |                               |         |               |            |
| 6.4 How soon after eating did you have a snack <b><u>before quarantine?</u></b>       | I never have a snack.         | <30 min | 0.5 a 2 hours | > 2 hourse |
|                                                                                       |                               |         |               |            |
